# Supplementary material for: Base-specific mutational intolerance near splice sites clarifies the role of nonessential splice nucleotides
Source: PubMed Central journal article supplement — Genome Res. 2018 Jul;28(7):968–74. doi: 10.1101/gr.231902.117 (PMC6028136; doi:10.1101/gr.231902.117), 2018-07
Supplement: supp_gr.231902.117_Supplemental_Fig_S1.pdf [file supp_gr.231902.117_Supplemental_Fig_S1.pdf]

**Supplemental Fig S1** Example of contingency table used to quantify intolerance of mutations of a reference allele at a near-splice site position (D+6 T allele)

|           | Num. of mutations disrupting the reference allele | Num. of reference alleles - Num. of mutations |
|-----------|---------------------------------------------------|-----------------------------------------------|
| pLI < 0.9 | 3978                                              | 44837.3                                       |
| pLI > 0.9 | 1183                                              | 19442.8                                       |

Chi-squared statistics and odds ratios are used to test for association between pLI status and mutation rates, or in other words whether loss-of-function intolerant genes (genes with pLI > 0.9) are significantly devoid of mutations compared to other genes. In this example (D+6 T allele), chi-squared statistic = 122.7 and odds ratio = 1.46.
