# Supplementary material for: Base-specific mutational intolerance near splice sites clarifies the role of nonessential splice nucleotides
Source: PubMed Central journal article supplement — Genome Res. 2018 Jul;28(7):968–74. doi: 10.1101/gr.231902.117 (PMC6028136; doi:10.1101/gr.231902.117), 2018-07
Supplement: supp_gr.231902.117_Supplemental_Table_S2.pdf [file supp_gr.231902.117_Supplemental_Table_S2.pdf]

**Supplemental Table S2** Evaluation of the independence of constrained reference bases and possible motifs

Example three-way contingency table to evaluate the effect of constrained reference base-disrupting mutations (“Independent Pos”) on nearby ones (“Combination Pos”)

|                                         |           | Num. of mutations disrupting Combination Pos reference allele | Num. of reference alleles - Num. of Combination Pos mutations |
|-----------------------------------------|-----------|---------------------------------------------------------------|---------------------------------------------------------------|
| Table 1: Independent Pos mutation = Yes | pLI < 0.9 | a1                                                            | b1                                                            |
|                                         | pLI > 0.9 | c1                                                            | d1                                                            |

|                                        |           |    |    |
|----------------------------------------|-----------|----|----|
| Table 2: Independent Pos mutation = No | pLI < 0.9 | a2 | b2 |
|                                        | pLI > 0.9 | c2 | d2 |

Results of the Breslow-Day test studying whether the presence of an independent position mutation affects odds ratios of nearby combination position mutations. Rows where such effect is significant (Breslow-Day p-value < 0.05) are highlighted in light blue.

| Independent Pos | Combination Pos    | Breslowday.pvalue | Odds.inde.mut | Odds.inde.wt |
|-----------------|--------------------|-------------------|---------------|--------------|
| D+6             | D+5, D+4, D+3      | 0.213             | 1.41          | 1.69         |
| D+5             | D+6, D+4, D+3      | 0.001             | 0.91          | 1.47         |
| D+4             | D+6, D+5, D+3      | 0.418             | 1.53          | 1.72         |
| D+3             | D+6, D+5, D+4      | 0.046             | 1.41          | 1.85         |
| D+6             | D+5, D+4, D+3, D-1 | 0.905             | 1.54          | 1.58         |
| D+5             | D+6, D+4, D+3, D-1 | 0.021             | 0.99          | 1.45         |
| D+4             | D+6, D+5, D+3, D-1 | 0.905             | 1.53          | 1.56         |
| D+3             | D+6, D+5, D+4, D-1 | 0.232             | 1.37          | 1.67         |
| D-1             | D+6, D+5, D+4, D+3 | 0.004             | 0.95          | 1.43         |
| D+6             | D+5                | 0.461             | 2.09          | 2.30         |
| D+6             | D+4                | 0.806             | 1.55          | 1.49         |
| D+6             | D+3                | 0.080             | 1.12          | 1.44         |
| D+6             | D-1                | 0.722             | 2.19          | 2.29         |
| D+5             | D+4                | 0.005             | 1.04          | 1.46         |
| D+5             | D+3                | 0.022             | 1.12          | 1.42         |
| D+5             | D-1                | 0.069             | 1.97          | 2.32         |
| D+4             | D+3                | 0.200             | 1.17          | 1.37         |
| D+4             | D-1                | 0.271             | 2.06          | 2.35         |
| D+3             | D-1                | 0.120             | 2.25          | 2.67         |
