# Supplementary material for: Base-specific mutational intolerance near splice sites clarifies the role of nonessential splice nucleotides
Source: HighWire-hosted journal article supplement (doi:10.1101/gr.231902.117), 2018-06-01
Supplement: Supplemental_Table_S3.xlsx [file Supplemental_Table_S3.xlsx]

## Sheet: De_novo_mutations
De novo mutations at near-splice sites in published autism spectrum disorder (ASD) and developmental delay/intellectural disability (DD/ID/ID) studies*
Only mutations hitting genes with >=2 de novo protein truncating variants (PTV) in cases are listed
*Rauch et al. 2012, de Ligt et al. 2012, De Rubeis et al. 2014, Iossifov et al. 2014, Deciphering Developmental Disorders Study 2015 and 2016. These datasets were jointly analyzed in Kosmicki et al. 2017.
Rows with near-splice site mutations at the constrained reference bases as defined in this paper is highlighted in green
Position	Chisq	Ref	Alt	Gene	pLI	Toal number of de novo PTVs in the gene	Disease
A-3	150.431	C	G	EHMT1	1	9	DD/ID
A-3	24.1803	C	A	ARID1A	1	2	DD/ID
A-4	8.24237	A	G	FBXO11	0.99998	3	DD/ID
A-5	1.02857	A	G	CTNND1	0.995313	2	DD/ID
A-5	2.47799	A	C	RFX7	0.999681	2	DD/ID
A-6	2.62322	T	G	CTNNB1	0.999813	16	DD/ID
A-7	2.99914	C	G	SRCAP	1	7	DD/ID
A-7	1.15009	A	G	BRWD1	0.999999	3	ASD
A-8	0.0767925	T	C	TTN	1.21111e-32	2	DD/ID
A+1	122.131	G	A	SATB2	0.999563	9	DD/ID
A+1	25.7424	C	A	ZNF462	1	2	ASD
A+1	122.131	G	A	EFTUD2	0.999991	2	DD/ID
A+10	65.6236	G	A	MAP4K4	0.999999	2	DD/ID
A+10	1.90167	T	A	TTN	1.21111e-32	2	DD/ID
A+11	12.9787	A	G	POGZ	0.999999	15	ASD
A+11	35.5517	G	A	CHD8	1	11	ASD
A+11	18.1712	C	T	GATAD2B	0.998595	10	DD/ID
A+11	12.9787	A	G	CREBBP	1	3	DD/ID
A+11	35.5517	G	A	FOXP2	0.996179	3	DD/ID
A+11	18.1712	C	T	SIN3A	1	3	DD/ID
A+3	7.51464	G	A	FOXP1	0.999751	10	DD/ID
A+3	14.3964	C	T	CHD2	1	9	ASD
A+3	14.3964	C	T	CHD2	1	9	DD/ID
A+4	3.43308	A	G	KMT2A	1	28	DD/ID
A+4	17.6219	T	G	EP300	1	13	DD/ID
A+4	7.22555	T	A	KDM5B	5.0942e-05	4	ASD
A+4	31.1641	C	T	GRIN2B	0.999995	2	DD/ID
A+5	30.7472	C	T	SCN2A	1	14	ASD
A+5	16.2495	C	G	GATAD2B	0.998595	10	DD/ID
A+5	30.7472	C	T	TRIP12	1	5	ASD
A+5	16.2495	C	G	PHIP	1	4	ASD
A+5	16.6812	G	T	SPTBN1	1	2	ASD
A+6	23.0514	G	A	STXBP1	0.999883	6	DD/ID
A+6	2.85966	A	T	BRWD1	0.999999	3	DD/ID
A+7	12.993	T	G	MED13L	1	12	DD/ID
A+7	41.5677	C	T	CACNA1E	1	2	ASD
A+7	15.1561	A	G	FBN1	1	2	ASD
A+7	41.5677	C	T	DOPEY1	0.999996	2	DD/ID
A+8	16.8174	G	T	KMT2A	1	28	DD/ID
A+8	9.93002	C	G	DLG4	0.996593	4	DD/ID
A+8	10.548	A	G	KMT2D	1	2	ASD
A+8	15.7527	C	T	FBN1	1	2	ASD
A+9	17.1863	G	T	LARP4B	0.999886	3	DD/ID
A+9	13.2774	G	A	KDM6B	0.999994	2	ASD
A+9	17.0188	C	T	CASZ1	0.999938	2	DD/ID
D-1	791.717	G	A	ARID1B	0.99995	36	DD/ID
D-1	791.717	G	A	SYNGAP1	0.999998	20	ASD
D-1	791.717	G	A	SYNGAP1	0.999998	20	DD/ID
D-1	350.883	G	C	SYNGAP1	0.999998	20	DD/ID
D-1	791.717	G	A	TCF4	0.999867	11	ASD
D-1	350.883	G	C	TCF4	0.999867	11	DD/ID
D-1	791.717	G	A	SLC6A1	0.999302	3	ASD
D-1	261.568	G	T	NAA15	0.998577	3	ASD
D-10	24.0967	C	T	DST	1	2	DD/ID
D-10	24.0967	C	T	FBN1	1	2	DD/ID
D-11	6.84374	A	G	ARID1B	0.99995	36	ASD
D-11	10.4509	A	C	SCN2A	1	14	DD/ID
D-11	6.84374	A	G	CHD2	1	9	ASD
D-11	48.1151	C	T	STXBP1	0.999883	6	DD/ID
D-11	48.1151	C	T	STXBP1	0.999883	6	DD/ID
D-11	48.1151	C	T	ANK2	1	5	ASD
D-11	48.1151	C	T	KMT2C	1	5	ASD
D-11	12.3759	G	C	MEF2C	0.00424617	4	DD/ID
D-11	6.84374	A	G	TBR1	0.993588	3	ASD
D-11	6.84374	A	G	MAP4K4	0.999999	2	DD/ID
D-2	9.6211	C	A	LRP2	1	2	DD/ID
D-2	5.64773	G	A	TTN	1.21111e-32	2	DD/ID
D-3	121.36	C	T	ARID1B	0.99995	36	DD/ID
D-3	121.36	C	T	ARID1B	0.99995	36	DD/ID
D-3	121.36	C	T	CTNNB1	0.999813	16	DD/ID
D-3	121.36	C	T	CHD8	1	11	ASD
D-3	25.1794	C	A	NAA15	0.998577	3	DD/ID
D-3	67.6537	G	A	TRAK1	9.70917e-05	2	ASD
D-3	13.7904	T	G	WDR26	0.999677	2	DD/ID
D-4	3.27429	G	A	MYT1L	0.999964	4	DD/ID
D-4	9.44371	A	T	WDFY3	1	2	ASD
D-5	16.9467	C	T	EP300	1	13	DD/ID
D-5	10.4688	A	G	PHIP	1	4	DD/ID
D-5	9.7364	A	T	ARID1A	1	2	ASD
D-6	13.0103	C	A	ARID1B	0.99995	36	ASD
D-6	54.7287	C	T	CLTC	1	4	DD/ID
D-7	11.2886	C	T	EP300	1	13	DD/ID
D-7	15.0326	G	C	SRCAP	1	7	ASD
D-8	6.64034	G	T	SATB2	0.999563	9	DD/ID
D-8	13.26	C	G	TNRC6B	1	3	DD/ID
D-8	50.7099	G	A	WDFY3	1	2	ASD
D-9	33.459	C	T	ARID1B	0.99995	36	DD/ID
D-9	17.8111	T	A	ASXL3	0.999977	20	DD/ID
D-9	33.459	C	T	SATB2	0.999563	9	DD/ID
D-9	8.60916	A	T	FBXO11	0.99998	3	ASD
D-9	7.47478	A	C	TBR1	0.993588	3	ASD
D-9	33.459	C	T	STARD9	0	3	ASD
D-9	23.6585	C	A	CUL3	0.974063	3	DD/ID
D+10	1.92424	G	A	KMT2E	1	2	ASD
D+3	91.0029	A	G	NCKAP1	1	2	ASD
D+3	91.0029	A	G	NIN	8.93549e-06	2	ASD
D+4	68.3946	A	G	SCN2A	1	14	DD/ID
D+4	68.3946	A	G	TRIP12	1	5	DD/ID
D+5	92.0247	G	T	KMT2A	1	28	DD/ID
D+5	425.2	G	A	EP300	1	13	DD/ID
D+5	147.53	G	C	KDM6B	0.999994	2	ASD
D+6	32.7526	T	A	HNRNPK	0.999782	2	DD/ID
D+7	1.7912	C	G	GIGYF1	0.978705	2	ASD
D+8	1.69285	C	A	MBD5	0.999852	4	ASD
